# Supplementary material for: User testing of a diagnostic decision support system with machine-assisted chart review to facilitate clinical genomic diagnosis
Source: HighWire-hosted journal article supplement (doi:10.1136/bmjhci-2021-100331), 2021-05-01
Supplement: bmjhci-2021-100331supp002_data_supplement.pdf [file bmjhci-2021-100331supp002_data_supplement.pdf]

Supplemental figure A

**SUPPLEMENTARY Figure A:** SimulConsult interface showing **Gene zygosity**s found in the genomic analysis

**Pertinent gene zygosity**

| Severity | Presence | Report |
|----------|----------|--------|
| 3        | ✓        |        |
| 4        | ✓        |        |
| 2        | ✓        |        |
| 3c       | ✓        |        |
| 2c       | ✓        |        |
| 2        | ✓        |        |
| 2        | ✓        |        |

**Gene zygosity ranked by pertinence**

- FBN1 gene variant (monoallelic)
- IGHMBP2 gene variants (biallelic)
- GAS2L2 gene variants (biallelic)
- PLOD3 gene variants (biallelic)
- PLEC gene variants (biallelic)
- CUBN gene variants (biallelic)
- COL1A2 gene variants (biallelic)
- CD36 gene variants (biallelic)
- HECW2 gene variant (monoallelic)
- HLA-DQA1 gene variants (biallelic)

100% pertinence ↑
